1 Early embryonic loss following intravaginal Zika virus challenge in rhesus macaques

2  
3 Christina M. Newman<sup>1</sup>, Alice F. Tarantal<sup>2,3</sup>, Michele L. Martinez<sup>2</sup>, Heather A. Simmons<sup>4</sup>, Terry K. Morgan<sup>5</sup>,  
4 Xiankun Zeng<sup>6</sup>, Jenna R. Rosinski<sup>1</sup>, Mason I. Bliss<sup>7</sup>, Ellie K. Bohm<sup>8</sup>, Dawn M. Dudley<sup>1</sup>, Matthew T. Aliota<sup>8</sup>,  
5 Thomas C. Friedrich<sup>7</sup>, Christopher J. Miller<sup>3,9</sup>, David H. O'Connor<sup>1,4</sup>

6  
7 <sup>1</sup>Pathology and Laboratory Medicine, University of Wisconsin-Madison, Madison, WI, USA

8 <sup>2</sup>Pediatrics and, Cell Biology and Human Anatomy, School of Medicine, University of California, Davis, CA,  
9 USA

10 <sup>3</sup>California National Primate Research Center, University of California, Davis, CA, USA

11 <sup>4</sup>Wisconsin National Primate Research Center, University of Wisconsin-Madison, Madison, WI, USA

12 <sup>5</sup>Pathology, Oregon Health and Sciences University, Portland, OR, USA

13 <sup>6</sup>United States Army Medical Research Institute of Infectious Diseases, Frederick, MD, USA

14 <sup>7</sup>Pathobiological Sciences, University of Wisconsin-Madison, Madison, WI, USA

15 <sup>8</sup>Veterinary and Biomedical Sciences, University of Minnesota, Saint Paul, MN, USA

16 <sup>9</sup>Pathology, Microbiology, and Immunology, School of Veterinary Medicine, Center for Immunology and  
17 Infectious Diseases, University of California, Davis, CA, USA

18  
19 \*Correspondence:

20 David H. O'Connor, [dhoconno@wisc.edu](mailto:dhoconno@wisc.edu)

21  
22 Running title: Intravaginal ZIKV challenge in pregnancy

23  
24 Keywords: Zika virus, macaques, pregnancy, intravaginal infection, embryo demise

25  
26 No. figures: 5

No. tables: 4

Word count: 4909

27  
28  
29  
30  
31  
32  
33  
34  
35  
36  
37  
38  
39  
40  
41  
42  
43  
44  
45  
46  
47  
48  
49  
50  
51  
52  
53  
54  
55

56 Abstract

57 Zika virus (ZIKV) is an arthropod-borne virus (arbovirus) and is primarily transmitted by *Aedes* species  
58 mosquitoes; however, ZIKV can also be sexually transmitted. During the initial epidemic and in places  
59 where ZIKV is now considered endemic, it is difficult to disentangle the risks and contributions of sexual  
60 versus vector-borne transmission to adverse pregnancy outcomes. To examine the potential impact of  
61 sexual transmission of ZIKV on pregnancy outcome, we challenged three rhesus macaques (*Macaca*  
62 *mulatta*) three times intravaginally with  $1 \times 10^7$  PFU of a low passage, African lineage ZIKV isolate (ZIKV-  
63 DAK) in the first trimester (~30 days gestational age). Samples were collected from all animals initially on  
64 days 3 through 10 post challenge, followed by twice, and then once weekly sample collection; ultrasound  
65 examinations were performed every 3-4 days then weekly as pregnancies progressed. All three dams had  
66 ZIKV RNA detectable in plasma on day 3 post-ZIKV challenge. At approximately 45 days gestation (17-18  
67 days post-challenge), two of the three dams were found to have nonviable embryos by ultrasound. Viral  
68 RNA was detected in recovered tissues and at the maternal-fetal interface (MFI) in both cases. The  
69 remaining viable pregnancy proceeded to near term (~155 days gestational age) and ZIKV RNA was  
70 detected at the MFI but not in fetal tissues. These results suggest that sexual transmission of ZIKV may  
71 represent an underappreciated risk of pregnancy loss during early gestation.

72

73

74

75

76

77

78

79

80

81

82

83

84

85

86

87

88

89

90

91

92

93

94

95

96

97

98

99

100

101

102

103

104

105

106

107

108

109

110

111  
112  
113  
114  
115  
116  
117  
118  
119  
120  
121  
122  
123  
124  
125  
126  
127  
128  
129  
130  
131  
132  
133  
134  
135  
136  
137  
138  
139  
140  
141  
142  
143  
144  
145  
146  
147  
148  
149  
150  
151  
152  
153  
154  
155  
156  
157  
158  
159  
160  
161  
162  
163  
164  
165

## Introduction

Zika virus (ZIKV) emerged from relative obscurity five years ago to sweep through tropical and subtropical regions of the Western hemisphere. More than a million cases between 2015 and 2018 were reported in Pan American Health Organization (PAHO) regions alone (1). While ZIKV primarily causes mild febrile illness or asymptomatic infections in a majority of individuals, infection during pregnancy can result in a range of adverse outcomes including fetal loss and a constellation of birth defects now known as congenital Zika syndrome (CZS) (2–4). Human infection with ZIKV can occur following mosquito-borne, vertical, and sexual transmission (5–7). While mosquito-borne transmission from infected *Aedes* species mosquitoes is thought to be the most common route of infection in endemic areas, the contribution of sexual transmission in epidemics remains poorly understood, in part because during an outbreak, both transmission routes occur simultaneously and can be challenging to disentangle (8).

Sexual transmission of ZIKV was first documented in 2008 when a scientist working in Senegal became infected and, upon his return to the United States, infected his wife (9). Throughout the ZIKV outbreak in 2015 and 2016, additional sexually-transmitted infections were documented (10–14). The majority of sexually-transmitted cases in non-endemic areas are likely the result of infection of the primary cases during travel, followed by inadvertent transmission to the secondary cases upon returning home (7). As previously mentioned, sexually-transmitted ZIKV infections in endemic areas or areas experiencing active outbreaks are difficult to differentiate from mosquito-transmitted infections because there may be an individual risk of exposure by either route. Epidemiological data suggest that sexual transmission occurs primarily male-to-female through vaginal contact, even weeks after clinical symptom resolution, which suggests that sexual transmission of ZIKV does pose at least a theoretical risk to pregnant women (15). Furthermore, the ZIKV viral RNA (vRNA) load in human semen has been reported to range from the hundreds to tens of millions of copies per milliliter, with values as high as  $3.98 \times 10^8$  copies/ml reported (16–18). The testes in particular, were found to be a ZIKV reservoir in animal models (19,20). In addition, studies have recently shown that intimate partners of household index cases are more likely to also be positive or show serologic evidence of ZIKV infection relative to other members of the same household (21).

Overall, we have limited information regarding the risk of ZIKV sexual transmission to pregnant women and their developing fetuses (14). Sexual transmission may be especially relevant during early pregnancy, since pregnancy can be inherently linked to unprotected sex. Likewise, studies have shown that other sexually transmitted ascending vaginal infections are associated with an increased risk of pre-term labor and other poor outcomes (22). Whether an ascending intravaginal ZIKV infection poses a higher risk to pregnancy than mosquito-borne infection is currently unknown. Pregnant women or women trying to become pregnant may be less likely to utilize condoms, a recommended strategy for the prevention of sexual transmission of ZIKV (23,24). Furthermore, a woman might not be aware of a pregnancy during early gestation and unfortunately, existing data suggest that the highest risk for developmental anomalies associated with ZIKV infection is during the first trimester, a critical developmental window (25–27). Additionally, ZIKV infection during pregnancy has also been associated with an increased risk for spontaneous abortion in both humans and nonhuman primates (28,29).

Animal models have played a critical role in improving our understanding of the natural history and pathogenesis of ZIKV. To-date, both murine and nonhuman primate (NHP) models have been utilized to examine aspects of sexual transmission of ZIKV (19,20,30,31). Studies in these models have shown persistent shedding of vRNA from the reproductive tract, infection of the female reproductive tract via a vaginal exposure route, and fetal effects as a result of vaginal exposure or sexual transmission in mice (20,30–39). Although studies in pregnant olive baboons have shown that intravaginal challenge with infected baboon semen during mid-gestation can result in productive maternal infection and vRNA detection in some maternal tissues and placentas, to date, studies in NHP have not shown clear evidence of vertical transmission associated with maternal ZIKV infection by the intravaginal route (33).

Because infection during the first trimester is associated with the highest risk for adverse pregnancy outcomes, and because unprotected sexual contact may be more likely during the first trimester, we

166 designed a proof-of-concept study in which we challenged three gravid rhesus macaques (*Macaca*  
167 *mulatta*) intravaginally with ZIKV. Our goal was to investigate the potential impact of intravaginal ZIKV  
168 challenge during the first trimester on fetal and pregnancy outcomes and to develop a model for sexual  
169 transmission during early pregnancy.

170  
171 Methods

172  
173 Ethics Statement

174  
175 All animal procedures conformed to the requirements of the Animal Welfare Act and protocols were  
176 approved prior to implementation by the Institutional Animal Care and Use Committee (IACUC) at the  
177 University of California, Davis. Activities related to animal care, housing, and diet were performed  
178 according to California National Primate Research Center (CNPRC) standard operating procedures  
179 (SOPs). SOPs for colony management and related procedures are reviewed and approved by the UC  
180 Davis IACUC.

181  
182 Study design

183  
184 Female rhesus macaques (*Macaca mulatta*, N=3) were time-mated and identified as pregnant by  
185 ultrasound according to established methods (40). Prior to study assignment normal embryonic growth  
186 and development were confirmed by ultrasound. Females were challenged in the first trimester at  
187 approximately 30 days gestational age (trimesters divided by 55-day increments; term 165±10 days) with  
188  $1 \times 10^7$  PFU ZIKV-DAK three times intravaginally at approximately two-hour intervals (**Table 1, Figure 1**).  
189 Pregnancies were monitored by ultrasound every 3-4 days post-challenge and then weekly from day 50  
190 onward throughout the study period. Standardized parameters were assessed including fetal growth  
191 (greatest length then biparietal and occipitofrontal diameters, abdominal circumference, humerus and  
192 femur lengths) and structural development, amniotic fluid volumes and placental parameters, and  
193 compared to normal growth and developmental trajectories for the species (40). Dams were weighed at  
194 each sedation and blood samples were collected daily from day 3 through day 10 post-challenge, followed  
195 by bi-weekly until maternal plasma vRNA loads were undetectable, and then weekly until hysterotomy.  
196 Plasma and peripheral blood mononuclear cells (PBMCs) were isolated at all time points, and serum was  
197 collected on days 0, 14, and 24 post-challenge (dams 049-102 and 049-103), and on days 0, 14, 27, and  
198 122 post-challenge for dam 049-101. Urine was collected by ultrasound-guided cystocentesis (~1 ml) on  
199 days 7, 10, 14, 21, and 24 post-challenge (dams 049-102 and 049-103) and on days 7, 10, 14, 27, and  
200 122 post-challenge for dam 049-101. Hysterotomies were performed for dam 049-102 and 049-103 at the  
201 end of the first trimester (post-detection of nonviable embryos by ultrasound) and near term (~155 days  
202 gestational age) for dam 049-101.

203  
204 Virus challenge preparation and infection

205  
206 ZIKV strain Zika virus/A.africanus-tc/Senegal/1984/DAK AR 41524 (ZIKV-DAK; GenBank: KX601166) was  
207 originally isolated from *Aedes luteocephalus* mosquitoes in Senegal in 1984. One round of amplification  
208 on *Aedes pseudocutellaris* cells, followed by amplification on C6/36 cells and two rounds of amplification  
209 on Vero cells, were used to prepare a master stock obtained from BEI Resources (Manassas, VA).  
210 Challenge stocks were prepared from this master stock by inoculation onto a confluent monolayer of C6/36  
211 mosquito cells as described previously (41). Prior to administration, the ZIKV-DAK stock was diluted to  
212  $1 \times 10^7$  PFU in 1 ml sterile saline and delivered via a 1 ml tuberculin syringe (37). Animals were inoculated  
213 three times intravaginally under ketamine sedation at approximately two-hour intervals using a previously  
214 described method (37).

215  
216 Blood processing and plasma vRNA loads

217  
218 Plasma and PBMCs were isolated from blood placed in EDTA vacutainers and processed at 1500 RPM  
219 for 15 minutes according to standard protocols. Serum was isolated from whole blood collected into glass  
220 vacutainers without additives. Viral RNA was extracted from 300 µl plasma as previously described with a

221 Maxwell 16 MDx instrument (Promega, Madison, WI) and evaluated using qRT-PCR (42). RNA  
222 concentration was determined by interpolation onto an internal standard curve of seven ten-fold serial  
223 dilutions of a synthetic ZIKV RNA segment based on Zika virus/Human/French Polynesia/10087PF/2013  
224 (ZIKV-FP). The limit of quantification of the ZIKV qRT-PCR assay is estimated to be 100 copies vRNA/ml  
225 plasma or serum.  
226

#### 227 Hysterotomy and tissue collection

228

229 Dams 049-102 and 049-103 were scheduled for hysterotomies in the late first trimester (nonviable embryos  
230 detected 3 days prior to hysterotomy). The hysterotomy for dam 049-101 was performed at approximately  
231 155 days gestational age according to the original study design (**Figure 1**) and following established  
232 protocols (43). The gestational sac was removed for fetal tissue assessments, with a modified collection  
233 protocol for nonviable specimens (see below). For the fetus from dam 049-101 amniotic fluid, fetal blood,  
234 and fetal cerebrospinal fluid were collected, then fetal body weights and measures (biparietal and  
235 occipitofrontal diameters, abdominal and arm circumferences, hand and foot lengths, humerus and femur  
236 lengths, crown-rump length) were assessed. The left cerebral hemisphere and left eye were collected  
237 under aseptic conditions and shipped with cold packs to Wisconsin by overnight delivery for additional  
238 assessments (see below). Specimens collected for qRT-PCR for vRNA analysis included dura mater; right  
239 cerebral hemisphere (frontal, parietal, temporal, occipital lobes); cerebellum (right and left) and midbrain;  
240 right optic nerve; right eye (cornea, retina, sclera); spinal cord (cervical, thoracic, lumbar); right and left  
241 parotid glands, submandibular, and salivary glands; omentum; thymus; spleen; liver (right, left, quadrate,  
242 caudate lobes); pancreas; right and left adrenal glands and kidneys; right and left axillary and inguinal  
243 lymph nodes; diaphragm; tracheobronchial and mesenteric lymph nodes; right and left thyroids; trachea;  
244 esophagus; pericardium; aorta; right and left atria and ventricles; lung lobes (right and left; all lobes);  
245 reproductive tract including right and left gonads; urinary bladder; gastrointestinal tract (stomach,  
246 duodenum, jejunum, ileum, colon; meconium), skin, skeletal muscle, and bone marrow (**Table 2**). The  
247 placenta was weighed and assessed including disk measurements (primary and secondary for bidiscoid  
248 placentas; primary disk only for monodiscoid), umbilical cord and membrane insertion sites, blood vessel  
249 distribution, cut surfaces, and examined for the presence of infarcts. Decidua, membranes, umbilical cord,  
250 and multiple sections of the placental disks were collected. All specimens were quick frozen in triplicate  
251 over liquid nitrogen for qRT-PCR analysis or collected into RNeasy (cat# R0901, Sigma-Aldrich, St. Louis,  
252 MO). Multiple blocks of tissues were collected in histology cassettes fixed in 10% buffered formalin,  
253 embedded, sectioned (5-6  $\mu$ m) and stained with hematoxylin and eosin (H&E) or used for *in situ*  
254 hybridization (ISH).  
255

256 For dams 049-102 and 049-103 a modified collection was performed, consistent with the early  
257 developmental stage of the conceptus (**Table 2**). Decidua, membranes, umbilical cord, and multiple  
258 sections of the placental disks were collected as noted above.  
259

260 Fresh samples collected from the 049-101 fetus (left cerebral hemisphere and left eye) were shipped with  
261 cold packs for additional assessments as noted above; the eye was analyzed by the Comparative Ocular  
262 Pathology Laboratory of Wisconsin (COPLOW). Placental tissues from all dams and tissues for the fetus  
263 from dam 049-101 were assessed as described previously in Koenig et al. (44).  
264

#### 265 Tissue, urine, and amniotic fluid vRNA loads

266

267 Maternal-fetal interface (MFI) and fetal tissue vRNA loads were determined from approximately 20 mg of  
268 each tissue. ZIKV RNA was isolated from tissues using the Qiagen AllPrep DNA/RNA Mini Kit (cat# 80284,  
269 Qiagen, Germantown MD) using the QIAcube following the manufacturer's protocol. Viral RNA was  
270 isolated from 140  $\mu$ l maternal urine or amniotic fluid using the QIAmp Viral RNA minikit (cat# 52904,  
271 Qiagen, Germantown MD) following the manufacturer's protocol. Following isolation, cDNA synthesis was  
272 performed using the Qiagen Sensiscript RT kit (cat# 205213, Qiagen, Germantown MD) according to the  
273 manufacturer's protocol. Quantification of vRNA load was performed by real-time PCR using the Taqman  
274 amplification system and the QuantStudio 12 K Flex Real-Time PCR System (ThermoFisher Scientific,

275 Grand Island, NY) as described previously (43). The estimated limit of quantification of the assay is 50-  
276 100 ZIKV RNA copies/mg tissue (average = 75 copies/mg).

277  
278 *In situ* hybridization (ISH)

279  
280 ISH probes against the ZIKV genome were commercially purchased (cat# 468361, Advanced Cell  
281 Diagnostics, Newark, CA). ISH was performed using the RNAscope® Red 2.5 kit (cat# 322350, Advanced  
282 Cell Diagnostics, Newark, CA) according to the manufacturer's protocol. After deparaffinization with xylene,  
283 a series of ethanol washes, and peroxidase blocking, sections were heated with the antigen retrieval buffer  
284 and then digested by proteinase. Sections were then exposed to the ISH target probe and incubated at  
285 40°C in a hybridization oven for two-hours. After rinsing, ISH signal was amplified using the provided pre-  
286 amplifier followed by the amplifier-containing labelled probe binding sites, and developed with a Fast Red  
287 chromogenic substrate for 10 minutes at room temperature. Sections were then stained with hematoxylin,  
288 air-dried, and mounted.

289  
290 Plaque reduction neutralization tests (PRNT)

291  
292 Titers of ZIKV neutralizing antibodies were determined using plaque reduction neutralization tests (PRNT)  
293 on Vero cells (ATCC #CCL-81) with a cutoff value of 90% (PRNT<sub>90</sub>) (45). Neutralization curves were  
294 generated in GraphPad Prism (San Diego, CA) and the resulting data were analyzed by nonlinear  
295 regression to estimate the dilution of serum required to inhibit 90% Vero cell culture infection (45,46).

296  
297 Results

298  
299 Repeated intravaginal ZIKV challenge results in infection in pregnant macaques

300  
301 All three dams had detectable ZIKV RNA in plasma by 3 days post intravaginal ZIKV challenge (**Figure 2**).  
302 ZIKV RNA loads peaked on day 5 for dams 049-101 and 049-102, and on day 6 for dam 049-103. Peak  
303 vRNA loads ranged from 1.57x10<sup>4</sup> copies/ml for 049-101 to 1.30x10<sup>5</sup> copies/ml for 049-103 (**Figure 2**).  
304 The latest detectable plasma vRNA load for animal 049-101 was on day 24 post-challenge (1.56x10<sup>2</sup>  
305 copies/ml). Dam 049-103 had a detectable plasma vRNA load until day 14 (2.46x10<sup>3</sup> copies/ml) but was  
306 negative on day 17 (the next time point samples were collected). Dam 049-102 was consistently positive  
307 for ZIKV vRNA until day 14, was negative on day 17, and then positive again on days 21 and 24 post  
308 challenge. Dam 049-102 was positive for ZIKV RNA in blood plasma collected at hysterotomy, the last  
309 time point sampled for the study. Overall, maternal plasma vRNA loads for dams 049-101, 049-102, and  
310 049-103 were somewhat delayed compared to animals subcutaneously inoculated with French Polynesian  
311 or Puerto Rican ZIKV isolates in our previous studies, but were consistent in magnitude with previous  
312 observations (42,47,48). In addition, maternal plasma vRNA loads peaked within a time period similar to  
313 subcutaneously inoculated animals infected with the same ZIKV isolate (ZIKV-DAK) (49) (**Figure 2**).

314  
315 Embryonic demise following intravaginal ZIKV infection during early pregnancy

316  
317 Ultrasound examinations indicated that the embryos of dams 049-102 and 049-103 were nonviable at  
318 approximately 17-18 days post-challenge. Hysterotomies were subsequently scheduled and performed  
319 and each dam's final blood and urine samples were collected (**Figure 3A**). Embryo and placental tissues  
320 from dams 049-102 and 049-103 were collected for vRNA analysis, histopathological assessment, and  
321 ISH. Dam 049-101's pregnancy progressed normally and sampling continued until the study endpoint and  
322 near-term hysterotomy at approximately 155 days gestational age (**Figure 3A**). All fetal and placental  
323 measurements for 049-101 were recorded and were considered within normal limits for gestational age  
324 (**Table 3**) (40).

325  
326 MFI, fetal tissues, and amniotic fluid are ZIKV RNA positive in early embryos

327  
328 ZIKV RNA was detected in the amniotic fluid from the conceptus of both dams 049-102 and 049-103 at  
329 3.87x10<sup>3</sup> and 7.38x10<sup>3</sup> copies/ml respectively at the time of hysterotomy (subsequent to embryonic death).

330 In addition, ZIKV RNA was detected in the brain and liver of both non-viable embryos, as well as in MFI  
331 tissues including the primary and secondary placental disks and membranes (amnion and chorion) (**Figure**  
332 **3B**). The highest tissue vRNA burden was detected in the brain of the embryo from dam 049-102 ( $1.74 \times 10^5$   
333 copies/mg). ZIKV RNA was not detected in amniotic fluid collected from the fetus of dam 049-101 at  
334 hysterotomy. Although a large number of fetal and MFI tissues were assessed following hysterotomy, the  
335 presence of ZIKV RNA was only detected in a subset of sections of MFI tissues from 049-101 (**Table 2**,  
336 **Figure 3C**). The decidua from all three dams were negative for ZIKV RNA by qRT-PCR. Similarly, ZIKV  
337 RNA was not detected in the urine for any of the dams at any of the time points sampled. Overall, these  
338 results highlight the focal nature of ZIKV RNA detection in fetal and MFI tissues following infection during  
339 pregnancy. For a number of tissues, multiple samples were collected for vRNA analysis but ZIKV was only  
340 detected in a subset of those samples (**Table 2**).

341  
342 Pathological changes in placental tissues following intravaginal ZIKV infection are non-specific  
343

344 Histopathological assessments of the placentas of dams 049-102 and 049-103 following embryonic demise  
345 showed generalized, non-specific mild necrosis (**Table 4**). In particular, the secondary placental disk from  
346 dam 049-102 showed significant necrosis for gestational age (tissues removed ~50 days gestation) which  
347 was estimated to be approximately a week after embryonic death occurred. Placentas from both dam 049-  
348 102 and dam 049-103 had minimal to mild multifocal villous mineralization. The primary placental disk of  
349 dam 049-102 showed moderate to marked intervillous hemorrhage and parenchymal ischemia. The  
350 placenta of dam 049-103 showed acute neutrophilic intervillitis and mild focal ischemia. In addition, the  
351 decidua from dam 049-102 showed some evidence of early decidual vasculitis. Similar to the placentas  
352 from the other two dams, the placenta of dam 049-101 showed mild, multifocal villous mineralization,  
353 findings which have previously been observed in control placentas. In addition, decidual tissue from dam  
354 049-101 showed mild, multifocal muscularization of the decidual arteries. Overall, changes in the placental  
355 tissues were mild and not associated with any specific pathological processes. Assessment of fetal tissues  
356 from dam 049-101 showed normal brain and eye morphology with no identified lesions.

357  
358 ZIKV genomic RNA is detected in MFI tissues from demise cases  
359

360 Tissue sections from decidua, primary placental disks, and secondary placental disks (bidiscoid placentas)  
361 were assessed by ZIKV ISH using RNAscope (see methods). ZIKV genomic RNA was detected in both  
362 the primary and secondary placental disks from dams 049-102 and 049-103 (**Figure 4**), but not from the  
363 primary placental disk from 049-101, nor any of the decidua sections from any of the pregnancies. The  
364 lack of ZIKV RNA in the decidua sections by ISH was consistent with the tissue vRNA assessment by qRT-  
365 PCR.

366  
367 Animals infected intravaginally with ZIKV during pregnancy develop neutralizing antibodies  
368

369 Serum neutralizing antibody titers (nAbs) against ZIKV were evaluated for dams 049-102 and 049-103 on  
370 days 0, 14, and 24 post-challenge by 90% plaque reduction neutralization tests (PRNT<sub>90</sub>). Serum samples  
371 from 0, 14, 27, and 122 days post-challenge collected from dam 049-101 were similarly assessed. Samples  
372 collected on day 0 (pre-challenge) from all animals were negative for ZIKV nAbs. Neutralizing Ab titers  
373 above 1:10 are indicative of immunity against ZIKV. Serum collected on day 14 post challenge from all  
374 animals neutralized ZIKV-DAK at levels considered protective by PRNT<sub>90</sub> (between 1:100 and 1:1000 for  
375 each animal). Serum collected on day 24 post-challenge from dams 049-102 and 049-103, and on day 27  
376 post-challenge from dam 049-101 showed an increased neutralization response relative to baseline (day  
377 0) and day 14 for each individual animal (**Figure 5**). By day 122 post-challenge, the ZIKV nAb response  
378 for animal 049-101 was lower than at days 14 or 27, but still demonstrated a strong protective response  
379 (PRNT<sub>90</sub> titer approximately 1:300) (**Figure 5**). These results suggest that all animals developed a nAb  
380 response against ZIKV following intravaginal ZIKV challenge consistent with that previously noted for  
381 rhesus dams infected subcutaneously (42,47,48).

382  
383 Discussion  
384

385 Here we describe a proof-of-concept study that indicates intravaginal challenge with ZIKV during early  
386 pregnancy results in productive maternal infection and suggests that infection by this route can also result  
387 in embryonic demise. ZIKV RNA was detected at the MFI and in fetal tissues, as well as in the amniotic  
388 fluid from the pregnancies of dams 049-102 and 049-103, supporting a role for ZIKV in the adverse  
389 pregnancy outcomes for these animals. Although ZIKV was detected by qRT-PCR in the MFI tissues from  
390 dam 049-101, no vRNA was detected in fetal tissues directly. Interestingly, although vRNA was detectable  
391 in the placenta of dam 049-101 by qRT-PCR, it was not detected by ISH. Given the focal nature of ZIKV  
392 RNA detected in the placental tissue samples collected from dam 049-101, it is likely that the samples  
393 evaluated by ISH were simply from areas without vRNA present (**Table 2**). In order to assess transmission  
394 in these studies we intentionally avoided any intrauterine sampling to ensure no confounding variables.  
395 Because vRNA was not detected in any fetal tissues, our results may suggest that vertical transmission  
396 did not occur between dam 049-101 and the developing fetus. Alternatively, the results may suggest  
397 immunologic elimination of virus at later gestational ages as previously suggested by a study using direct  
398 fetal ZIKV inoculation (43). Our decision to challenge the animals in this study early in pregnancy (~30  
399 days gestation) was based on findings in humans suggesting that during the first trimester, ZIKV infection  
400 is associated with a higher risk of adverse fetal and pregnancy outcomes (27,50–53)(43)(27,50–53). In  
401 addition, we hypothesized that early pregnancy, possibly before a woman knows she is pregnant, may be  
402 a period of especially high risk for sexual transmission of ZIKV because precautions against this  
403 transmission route, such as condoms, may not be utilized (23,24). Overall, our results suggest that sexual  
404 transmission of ZIKV during early pregnancy may represent a significant risk for adverse outcomes.

405  
406 Our results indicating early demise as a result of ZIKV infection are consistent with those described  
407 previously in a cross-center, cross-NHP species study (29). Interestingly, our finding that 2 of 3 (~66%)  
408 pregnancies ended in nonviable embryos following intravaginal ZIKV infection during early pregnancy  
409 represents a higher rate of loss than the ~26% previously reported for NHP (29). We acknowledge this  
410 loss rate is based on small animal numbers and could change as more animals are infected. Despite this  
411 higher rate compared to other NHP models reported to date, both near term and early gestation reflect  
412 periods of higher rates of spontaneous loss for macaques (54). While the loss rate reported in our study  
413 may be higher than the background rate of early loss in humans during the first trimester, data are very  
414 limited regarding the rate at which ZIKV-associated loss occurs in humans during the first trimester. A rate  
415 of around 11% was recently reported in a study during a period of epidemic transmission in Manaus, Brazil  
416 (55–58), although as noted, in many cases women may not be aware of an early pregnancy, thus the rate  
417 of loss could actually be higher. Additional studies with larger animal numbers will be necessary to  
418 determine the impact of the challenge dose, virus isolate, gestational age, and route of infection on  
419 pregnancy loss and how this relates to rates of spontaneous loss in early gestation.

420  
421 Some limitations of this study include the use of a relatively high dose of ZIKV to inoculate the dams, the  
422 inclusion of multiple challenges over a short timeframe, and the small number of animals included in the  
423 study. The dose of inoculum chosen for this study is representative of the high end of the ZIKV vRNA  
424 range reportedly detected in human semen, which can be up to 100,000 times higher than that in blood  
425 (16–18). In part, this dose was also chosen due to the small number of animals included, our interest in  
426 the impact of intravaginal ZIKV exposure early in pregnancy, and the need to maximize chances of  
427 successful infection during early gestation. Previous studies in nonpregnant NHP have shown that  
428 intravaginal ZIKV inoculation results in successful infection after a single challenge approximately 33-75  
429 percent of the time (31,37,59). In pregnant olive baboons, a single intravaginal inoculation mid-gestation  
430 with semen containing ZIKV (originating from French Polynesia or Puerto Rico) resulted in 4 of 6 animals  
431 developing detectable vRNA in blood, with an additional animal having detectable vRNA in blood after a  
432 second inoculation (33). This was the rationale for the choice to perform repeat challenges at two-hour  
433 intervals in this study: in order to maximize the likelihood of establishing a productive infection in our small  
434 cohort within a single day. We acknowledge that it is difficult to determine whether the inoculation route  
435 played a significant role in our observed outcomes or whether the cumulative inoculum dose, virus isolate,  
436 timing of infection, or some combination of these factors played a role in the observed outcomes. Future  
437 studies modeling sexual transmission should aim to determine which of these factors significantly impact  
438 pregnancy outcome.

439



440 We chose to utilize a low passage African ZIKV isolate (ZIKV-DAK) rather than a more contemporary  
441 isolate such as the commonly utilized PRVABC59 because, although it is also low passage, recent studies  
442 have suggested that this virus may have an attenuated phenotype and is not as pathogenic as ZIKV-DAK  
443 in mice (41,60). In addition, ZIKV was first isolated from a febrile rhesus macaque in the Zika Forest near  
444 Entebbe, Uganda in 1947 (61,62). Since that time, serologic and molecular (RNA or virus isolation)  
445 evidence of continued circulation in Africa has been intermittently reported in humans, animals, and  
446 mosquitoes (63–67). Prior to a report from Guinea-Bissau from 2016, during which an outbreak and  
447 subsequent identification of infant microcephaly cases was attributed to an African lineage virus, there  
448 were no reports of ZIKV impacting pregnancies and infant development in Africa (63,68). This has led to a  
449 number of hypotheses as to why, which includes, but is not limited to the following: widespread immunity  
450 in populations of childbearing age due to infection earlier in life; masking of ZIKV-associated adverse  
451 outcomes due to a high number of other, co-circulating pathogens in many populations, such as malaria;  
452 or embryonic loss during very early pregnancy simply unrecognized due to unknown status or inconsistent  
453 access to prenatal care (63,64,69). The data generated in this work supports the latter hypothesis of early  
454 loss. In reality, depending on the region, many of these factors could be playing an additive role in low  
455 and/or underreporting of ZIKV-associated pregnancy outcomes in Africa. Whether the early pregnancy  
456 losses observed in our study were due to increased pathogenicity of the African ZIKV isolate utilized  
457 relative to other isolates, the intravaginal route of infection, or both will require additional studies.  
458

459 Many key questions remain with regard to understanding how different ZIKV geographic isolates may  
460 differentially impact pregnancy and fetal developmental outcomes. This study suggests that NHP models  
461 may be able to differentiate pregnancy outcomes between different isolates. Route of maternal infection  
462 may also play a role in pregnancy outcomes, at least in the case of NHP, as intravenous and intra-amniotic  
463 ZIKV infections during pregnancy have been associated with lower fetal survival rates across multiple  
464 studies compared to subcutaneous inoculation (29). As shown here, intravaginal infection may also lower  
465 survival rates in early pregnancy. Ultimately, our study was designed to balance all of the potentially  
466 influential factors previously mentioned within the constraints of a proof-of-concept study and the  
467 requirement for challenge and infection to occur during early pregnancy in order to evaluate this question.  
468

469 Our results suggest that low passage, African lineage virus (ZIKV-DAK) has the potential to result in  
470 embryonic demise in rhesus macaques when infection occurs intravaginally and early in pregnancy. To  
471 our knowledge, this is the first NHP study to show clear evidence of vertical transmission of ZIKV following  
472 intravaginal infection, which has only previously been observed in mice (20,30,36). NHP, due to  
473 susceptibility without immune modulation, as well as having significant similarities to human pregnancy,  
474 may provide better approximations for human infections than other animal models (70). Furthermore, this  
475 is the first NHP study to show that African lineage ZIKV infection during pregnancy has the potential to  
476 result in severe fetal outcomes. Taken together, our results suggest that additional attention should be  
477 given to ongoing perinatal surveillance in African communities and to promoting awareness regarding the  
478 risks of sexual transmission of ZIKV in endemic areas.  
479

#### 480 Conflict of interest

481  
482 The authors declare that the research was conducted in the absence of any commercial or financial  
483 relationships that could be construed as a potential conflict of interest.  
484

#### 485 Author contributions

486  
487 CMN, AFT, CJM, DHO designed the study.  
488 AFT provided animal care, monitored the animals, and performed all sample collections.  
489 AFT, CJM performed animal infections.  
490 AFT, MLM, MIB, XZ, HAS, TKM, MTA, EKB analyzed samples.  
491 CMN, DMD, JRR curated data.  
492 CMN, JRR prepared the figures.  
493 CMN prepared the initial manuscript draft.  
494 All authors read, commented on, and edited the manuscript.

495

496 Funding

497

498 DHHS/PHS/NIH R01 A|1116382-01A1

499

500 Acknowledgements

501

502 We thank the research, animal care, and veterinary care staff at the California National Primate Research  
503 Center for caring for the animals and supporting this study amid the emerging SARS-CoV-2 pandemic. We  
504 also thank DHHS/PHS/NIH for providing the supplemental funding for R01 A1116382-01A1 that allowed  
505 this work to be completed. These studies were also supported by the California National Primate Research  
506 Center base operating grant #OD011107. *In vivo* imaging was performed with instrumentation funded by  
507 an NIH S10 grant #OD016261.

508

509 References

510

511 1. Zika cumulative cases. *PAHO* Available at:  
512 [https://www.paho.org/hq/index.php?option=com\\_content&view=article&id=12390:zika-cumulative-](https://www.paho.org/hq/index.php?option=com_content&view=article&id=12390:zika-cumulative-cases&Itemid=42090&lang=en)  
cases&Itemid=42090&lang=en [Accessed March 22, 2021]

513

514 2. Moore CA, Staples JE, Dobyns WB, Pessoa A, Ventura CV, Fonseca EB da, Ribeiro EM,  
515 Ventura LO, Neto NN, Arena JF, et al. Characterizing the Pattern of Anomalies in Congenital Zika  
Syndrome for Pediatric Clinicians. *JAMA Pediatr* (2017) **171**:288–295.

516

517 3. van der Eijk AA, van Genderen PJ, Verdijk RM, Reusken CB, Mögling R, van Kampen  
518 JJA, Widagdo W, Aron GI, GeurtsvanKessel CH, Pas SD, et al. Miscarriage Associated with Zika  
Virus Infection. *N Engl J Med* (2016) **375**:1002–1004.

519

520 4. Azevedo RSS, Araujo MT, Oliveira CS, Filho AJM, Nunes BTD, Henriques DF, Silva EVP,  
521 Carvalho VL, Chiang JO, Martins LC, et al. Zika Virus Epidemic in Brazil. II. Post-Mortem Analyses  
522 of Neonates with Microcephaly, Stillbirths, and Miscarriage. *J Clin Med Res* (2018) **7**:  
doi:10.3390/jcm7120496

523

524 5. Tabata T, Pettitt M, Puerta-Guardo H, Michlmayr D, Wang C, Fang-Hoover J, Harris E,  
525 Pereira L. Zika Virus Targets Different Primary Human Placental Cells, Suggesting Two Routes for  
Vertical Transmission. *Cell Host Microbe* (2016) **20**:155–166.

526

527 6. Gregory CJ, Oduyebo T, Brault AC, Brooks JT, Chung K-W, Hills S, Kuehnert MJ, Mead  
528 P, Meaney-Delman D, Rabe I, et al. Modes of Transmission of Zika Virus. *J Infect Dis* (2017)  
**216**:S875–S883.

529

530 7. Counotte MJ, Kim CR, Wang J, Bernstein K, Deal CD, Broutet NJN, Low N. Sexual  
531 transmission of Zika virus and other flaviviruses: A living systematic review. *PLoS Med* (2018)  
**15**:e1002611.

532

533 8. de Barros ACWG, Santos KG, Massad E, Coelho FC. Sex-Specific Asymmetrical Attack  
534 Rates in Combined Sexual-Vectorial Transmission Epidemics. *Microorganisms* (2019) **7**:  
doi:10.3390/microorganisms7040112.

535

536 9. Foy BD, Kobylinski KC, Chilson Foy JL, Blitvich BJ, Travassos da Rosa A, Haddow AD,  
537 Lanciotti RS, Tesh RB. Probable non-vector-borne transmission of Zika virus, Colorado, USA.  
*Emerg Infect Dis* (2011) **17**:880–882.

538

539 10. McCarthy M. Zika virus was transmitted by sexual contact in Texas, health officials report.  
*BMJ* (2016) **352**:i720.

- 540 11. D'Ortenzio E, Matheron S, Yazdanpanah Y, de Lamballerie X, Hubert B, Piorkowski G,  
541 Maquart M, Descamps D, Damond F, Leparco-Goffart I. Evidence of Sexual Transmission of Zika  
542 Virus. *N Engl J Med* (2016) **374**:2195–2198.
- 543 12. Deckard DT, Chung WM, Brooks JT, Smith JC, Woldai S, Hennessey M, Kwit N, Mead P.  
544 Male-to-Male Sexual Transmission of Zika Virus--Texas, January 2016. *MMWR Morb Mortal Wkly*  
545 *Rep* (2016) **65**:372–374.
- 546 13. Davidson A, Slavinski S, Komoto K, Rakeman J, Weiss D. Suspected Female-to-Male  
547 Sexual Transmission of Zika Virus - New York City, 2016. *MMWR Morb Mortal Wkly Rep* (2016)  
548 **65**:716–717.
- 549 14. Yarrington CD, Hamer DH, Kuohung W, Lee-Parritz A. Congenital Zika syndrome arising  
550 from sexual transmission of Zika virus, a case report. *Fertil Res Pract* (2019) **5**:1.
- 551 15. Turmel JM, Abgueguen P, Hubert B, Vandamme YM, Maquart M, Le Guillou-Guillemette  
552 H, Leparco-Goffart I. Late sexual transmission of Zika virus related to persistence in the semen.  
553 *Lancet* (2016) **387**:2501.
- 554 16. Musso D, Richard V, Teissier A, Stone M, Lanteri MC, Latoni G, Alsina J, Reik R, Busch  
555 MP, Recipient Epidemiology and Donor Evaluation Study (REDS-III) ZIKV Study Group. Detection  
556 of Zika virus RNA in semen of asymptomatic blood donors. *Clin Microbiol Infect* (2017) **23**:1001.e1–  
557 1001.e3.
- 558 17. Mead PS, Duggal NK, Hook SA, Delorey M, Fischer M, Olzenak McGuire D, Becksted H,  
559 Max RJ, Anishchenko M, Schwartz AM, et al. Zika Virus Shedding in Semen of Symptomatic  
560 Infected Men. *N Engl J Med* (2018) **378**:1377–1385.
- 561 18. Mansuy JM, Dutertre M, Mengelle C, Fourcade C, Marchou B, Delobel P, Izopet J, Martin-  
562 Blondel G. Zika virus: high infectious viral load in semen, a new sexually transmitted pathogen?  
563 *Lancet Infect Dis* (2016) **16**:405.
- 564 19. McDonald EM, Duggal NK, Brault AC. Pathogenesis and sexual transmission of  
565 Spondweni and Zika viruses. *PLoS Negl Trop Dis* (2017) **11**:e0005990.
- 566 20. Duggal NK, Ritter JM, Pectorius SE, Zaki SR, Davis BS, Chang G-JJ, Bowen RA, Brault  
567 AC. Frequent Zika Virus Sexual Transmission and Prolonged Viral RNA Shedding in an  
568 Immunodeficient Mouse Model. *Cell Rep* (2017) **18**:1751–1760.
- 569 21. Rosenberg ES, Doyle K, Munoz-Jordan JL, Klein L, Adams L, Lozier M, Weiss K, Sharp  
570 TM, Paz-Bailey G. Prevalence and Incidence of Zika Virus Infection Among Household Contacts of  
571 Patients With Zika Virus Disease, Puerto Rico, 2016-2017. *J Infect Dis* (2019) **220**:932–939.
- 572 22. Racicot K, Cardenas I, Wünsche V, Aldo P, Guller S, Means RE, Romero R, Mor G. Viral  
573 infection of the pregnant cervix predisposes to ascending bacterial infection. *J Immunol* (2013)  
574 **191**:934–941.
- 575 23. Teasdale CA, Abrams EJ, Chiasson MA, Justman J, Blanchard K, Jones HE. Sexual Risk  
576 and Intravaginal Practice Behavior Changes During Pregnancy. *Arch Sex Behav* (2017) **46**:539–  
577 548.
- 578 24. Salvesen von Essen B, Kortsmid K, Warner L, D'Angelo DV, Shulman HB, Virella WH,  
579 Taraporewalla A, Harrison L, Ellington S, Shapiro-Mendoza C, et al. Preventing Sexual  
580 Transmission of Zika Virus Infection during Pregnancy, Puerto Rico, USA, 2016. *Emerg Infect Dis*  
581 (2019) **25**:2115–2119.

- 582 25. Hoen B, Schaub B, Funk AL, Ardillon V, Boullard M, Cabié A, Callier C, Carles G,  
583 Cassadou S, Césaire R, et al. Pregnancy Outcomes after ZIKV Infection in French Territories in the  
584 Americas. *N Engl J Med* (2018) **378**:985–994.
- 585 26. Lin HZ, Tambyah PA, Yong EL, Biswas A, Chan S-Y. A review of Zika virus infections in  
586 pregnancy and implications for antenatal care in Singapore. *Singapore Med J* (2017) **58**:171–178.
- 587 27. Kleber de Oliveira W, Cortez-Escalante J, De Oliveira WTGH, do Carmo GMI, Henriques  
588 CMP, Coelho GE, Araújo de França GV. Increase in Reported Prevalence of Microcephaly in  
589 Infants Born to Women Living in Areas with Confirmed Zika Virus Transmission During the First  
590 Trimester of Pregnancy - Brazil, 2015. *MMWR Morb Mortal Wkly Rep* (2016) **65**:242–247.
- 591 28. Pomar L, Malinger G, Benoist G, Carles G, Ville Y, Rousset D, Hcini N, Pomar C, Jolivet  
592 A, Lambert V. Association between Zika virus and fetopathy: a prospective cohort study in French  
593 Guiana. *Ultrasound Obstet Gynecol* (2017) **49**:729–736.
- 594 29. Dudley DM, Van Rompay KK, Coffey LL, Ardeshir A, Keesler RI, Bliss-Moreau E, Grigsby  
595 PL, Steinbach RJ, Hirsch AJ, MacAllister RP, et al. Miscarriage and stillbirth following maternal Zika  
596 virus infection in nonhuman primates. *Nat Med* (2018) **24**:1104–1107.
- 597 30. Duggal NK, McDonald EM, Ritter JM, Brault AC. Sexual transmission of Zika virus  
598 enhances in utero transmission in a mouse model. *Sci Rep* (2018) **8**:4510.
- 599 31. Haddow AD, Perez-Sautu U, Wiley MR, Miller LJ, Kimmel AE, Principe LM, Wollen-  
600 Roberts SE, Shamblin JD, Valdez SM, Cazares LH, et al. Modeling mosquito-borne and sexual  
601 transmission of Zika virus in an enzootic host, the African green monkey. *PLoS Negl Trop Dis*  
602 (2020) **14**:e0008107.
- 603 32. Schmidt JK, Mean KD, Puntney RC, Alexander ES, Sullivan R, Simmons HA, Zeng X,  
604 Weiler AM, Friedrich TC, Golos TG. Zika virus in rhesus macaque semen and reproductive tract  
605 tissues: a pilot study of acute infection†. *Biol Reprod* (2020) **103**:1030–1042.
- 606 33. Gurung S, Nadeau H, Maxted M, Peregrine J, Reuter D, Norris A, Edwards R, Hyatt K,  
607 Singleton K, Papin JF, et al. Maternal Zika Virus (ZIKV) Infection following Vaginal Inoculation with  
608 ZIKV-Infected Semen in Timed-Pregnant Olive Baboons. *J Virol* (2020) **94**: doi:10.1128/JVI.00058-  
609 20
- 610 34. Peregrine J, Gurung S, Lindgren MC, Husain S, Zavy MT, Myers DA, Papin JF. Zika Virus  
611 Infection, Reproductive Organ Targeting, and Semen Transmission in the Male Olive Baboon. *J*  
612 *Virol* (2019) **94**: doi:10.1128/JVI.01434-19
- 613 35. Woollard SM, Olwenyi OA, Dutta D, Dave RS, Mathews S, Gorantla S, Johnson N,  
614 Giavedoni L, Norgren RB Jr, Byrareddy SN. Preliminary Studies on Immune Response and Viral  
615 Pathogenesis of Zika Virus in Rhesus Macaques. *Pathogens* (2018) **7**:  
616 doi:10.3390/pathogens7030070
- 617 36. Winkler CW, Woods TA, Rosenke R, Scott DP, Best SM, Peterson KE. Sexual and  
618 Vertical Transmission of Zika Virus in anti-interferon receptor-treated Rag1-deficient mice. *Sci Rep*  
619 (2017) **7**:7176.
- 620 37. Carroll T, Lo M, Lanteri M, Dutra J, Zarbock K, Silveira P, Rourke T, Ma Z-M, Fritts L,  
621 O'Connor S, et al. Zika virus preferentially replicates in the female reproductive tract after vaginal  
622 inoculation of rhesus macaques. *PLoS Pathog* (2017) **13**:e1006537.
- 623 38. Tang WW, Young MP, Mamidi A, Regla-Nava JA, Kim K, Shresta S. A Mouse Model of  
624 Zika Virus Sexual Transmission and Vaginal Viral Replication. *Cell Rep* (2016) **17**:3091–3098.

- 625 39. Yockey LJ, Varela L, Rakib T, Khoury-Hanold W, Fink SL, Stutz B, Szigeti-Buck K, Van  
626 den Pol A, Lindenbach BD, Horvath TL, et al. Vaginal Exposure to Zika Virus during Pregnancy  
627 Leads to Fetal Brain Infection. *Cell* (2016) **166**:1247–1256.e4.
- 628 40. F. TA. Ultrasound Imaging in Rhesus (*Macaca mulatta*) and Long-tailed (*Macaca*  
629 *fascicularis*) Macaques: Reproductive and Research Applications. *The Laboratory Primate*  
630 (2005)317–352. doi:10.1016/b978-012080261-6/50020-9
- 631 41. Jaeger AS, Murrieta RA, Goren LR, Crooks CM, Moriarty RV, Weiler AM, Rybarczyk S,  
632 Semler MR, Huffman C, Mejia A, et al. Zika viruses of African and Asian lineages cause fetal harm  
633 in a mouse model of vertical transmission. *PLoS Negl Trop Dis* (2019) **13**:e0007343.
- 634 42. Dudley DM, Aliota MT, Mohr EL, Weiler AM, Lehrer-Brey G, Weisgrau KL, Mohns MS,  
635 Breitbach ME, Rasheed MN, Newman CM, et al. A rhesus macaque model of Asian-lineage Zika  
636 virus infection. *Nat Commun* (2016) **7**:12204.
- 637 43. Tarantal AF, Hartigan-O'Connor DJ, Penna E, Kreutz A, Martinez ML, Noctor SC. Fetal  
638 Rhesus Monkey First Trimester Zika Virus Infection Impacts Cortical Development in the Second  
639 and Third Trimesters. *Cereb Cortex* (2020) doi:10.1093/cercor/bhaa336
- 640 44. Koenig MR, Razo E, Mitzey A, Newman CM, Dudley DM, Breitbach ME, Semler MR,  
641 Stewart LM, Weiler AM, Rybarczyk S, et al. Quantitative definition of neurobehavior, vision, hearing  
642 and brain volumes in macaques congenitally exposed to Zika virus. *PLoS One* (2020) **15**:e0235877.
- 643 45. Breitbach ME, Newman CM, Dudley DM, Stewart LM, Aliota MT, Koenig MR, Shepherd  
644 PM, Yamamoto K, Crooks CM, Young G, et al. Primary infection with dengue or Zika virus does not  
645 affect the severity of heterologous secondary infection in macaques. *PLoS Pathog* (2019)  
646 **15**:e1007766.
- 647 46. Lindsey HS, Calisher CH, Mathews JH. Serum dilution neutralization test for California  
648 group virus identification and serology. *J Clin Microbiol* (1976) **4**:503–510.
- 649 47. Nguyen SM, Antony KM, Dudley DM, Kohn S, Simmons HA, Wolfe B, Salamat MS,  
650 Teixeira LBC, Wiepz GJ, Thoong TH, et al. Highly efficient maternal-fetal Zika virus transmission in  
651 pregnant rhesus macaques. *PLoS Pathog* (2017) **13**:e1006378.
- 652 48. Mohr EL, Block LN, Newman CM, Stewart LM, Koenig M, Semler M, Breitbach ME,  
653 Teixeira LBC, Zeng X, Weiler AM, et al. Ocular and uteroplacental pathology in a macaque  
654 pregnancy with congenital Zika virus infection. *PLoS One* (2018) **13**:e0190617.
- 655 49. Crooks CM, Weiler AM, Rybarczyk SL, Bliss M, Jaeger AS, Murphy ME, Simmons HA,  
656 Mejia A, Fritsch MK, Hayes JM, et al. African-lineage Zika virus replication dynamics and maternal-  
657 fetal interface infection in pregnant rhesus macaques. *Cold Spring Harbor Laboratory*  
658 (2020)2020.11.30.405670. doi:10.1101/2020.11.30.405670
- 659 50. Honein MA, Dawson AL, Petersen EE, Jones AM, Lee EH, Yazdy MM, Ahmad N,  
660 Macdonald J, Evert N, Bingham A, et al. Birth Defects Among Fetuses and Infants of US Women  
661 With Evidence of Possible Zika Virus Infection During Pregnancy. *JAMA* (2017) **317**:59–68.
- 662 51. Peña F, Pimentel R, Khosla S, Mehta SD, Brito MO. Zika Virus Epidemic in Pregnant  
663 Women, Dominican Republic, 2016-2017. *Emerg Infect Dis* (2019) **25**:247–255.
- 664 52. Ospina ML, Tong VT, Gonzalez M, Valencia D, Mercado M, Gilboa SM, Rodriguez AJ,  
665 Tinker SC, Rico A, Winfield CM, et al. Zika Virus Disease and Pregnancy Outcomes in Colombia. *N*  
666 *Engl J Med* (2020) **383**:537–545.

- 667 53. Ades AE, Soriano-Arandes A, Alarcon A, Bonfante F, Thorne C, Peckham CS, Giaquinto  
668 C. Vertical transmission of Zika virus and its outcomes: a Bayesian synthesis of prospective studies.  
669 *Lancet Infect Dis* (2020) doi:10.1016/S1473-3099(20)30432-1
- 670 54. Hendrie TA, Peterson PE, Short JJ, Tarantal AF, Rothgarn E, Hendrie MI, Hendrickx AG.  
671 Frequency of prenatal loss in a macaque breeding colony. *Am J Primatol* (1996) **40**:41–53.
- 672 55. Brasil P, Pereira JP Jr, Moreira ME, Ribeiro Nogueira RM, Damasceno L, Wakimoto M,  
673 Rabello RS, Valderramos SG, Halai U-A, Salles TS, et al. Zika Virus Infection in Pregnant Women  
674 in Rio de Janeiro. *N Engl J Med* (2016) **375**:2321–2334.
- 675 56. Cohain JS, Buxbaum RE, Mankuta D. Spontaneous first trimester miscarriage rates per  
676 woman among parous women with 1 or more pregnancies of 24 weeks or more. *BMC Pregnancy  
677 Childbirth* (2017) **17**:437.
- 678 57. Redivo E de F, Bôtto Menezes C, da Costa Castilho M, Brock M, da Silva Magno E,  
679 Gomes Saraiva M das G, Alvarez Fernandes SS, Costa Antony de Andrade AB, Costa Alecrim M  
680 das G, Martinez-Espinosa FE. Zika Virus Infection in a Cohort of Pregnant Women with  
681 Exanthematic Disease in Manaus, Brazilian Amazon. *Viruses* (2020) **12**: doi:10.3390/v12121362
- 682 58. Oliver A, Overton C. Diagnosis and management of miscarriage. *Practitioner* (2014)  
683 **258**:25–8, 3.
- 684 59. Haddow AD, Nalca A, Rossi FD, Miller LJ, Wiley MR, Perez-Sautu U, Washington SC,  
685 Norris SL, Wollen-Roberts SE, Shamblyn JD, et al. High Infection Rates for Adult Macaques after  
686 Intravaginal or Intrarectal Inoculation with Zika Virus. *Emerg Infect Dis* (2017) **23**:1274–1281.
- 687 60. Duggal NK, McDonald EM, Weger-Lucarelli J, Hawks SA, Ritter JM, Romo H, Ebel GD,  
688 Brault AC. Mutations present in a low-passage Zika virus isolate result in attenuated pathogenesis  
689 in mice. *Virology* (2019) **530**:19–26.
- 690 61. Dick GWA, Kitchen SF, Haddow AJ. Zika virus. I. Isolations and serological specificity.  
691 *Trans R Soc Trop Med Hyg* (1952) **46**:509–520.
- 692 62. Dick GWA. Zika virus. II. Pathogenicity and physical properties. *Trans R Soc Trop Med  
693 Hyg* (1952) **46**:521–534.
- 694 63. Nutt C, Adams P. Zika in Africa-the invisible epidemic? *Lancet* (2017) **389**:1595–1596.
- 695 64. Marchi S, Viviani S, Montomoli E, Tang Y, Boccuto A, Vicenti I, Zazzi M, Sow S, Diallo A,  
696 Idoko OT, et al. Zika Virus in West Africa: A Seroepidemiological Study between 2007 and 2012.  
697 *Viruses* (2020) **12**: doi:10.3390/v12060641
- 698 65. McCrae AW, Kirya BG. Yellow fever and Zika virus epizootics and enzootics in Uganda.  
699 *Trans R Soc Trop Med Hyg* (1982) **76**:552–562.
- 700 66. Dick GW. Epidemiological notes on some viruses isolated in Uganda; Yellow fever, Rift  
701 Valley fever, Bwamba fever, West Nile, Mengo, Semliki forest, Bunyamwera, Ntaya, Uganda S and  
702 Zika viruses. *Trans R Soc Trop Med Hyg* (1953) **47**:13–48.
- 703 67. Kirya BG. A yellow fever epizootic in Zika forest, Uganda, during 1972: Part 1: Virus  
704 isolation and sentinel monkeys. *Trans R Soc Trop Med Hyg* (1977) **71**:254–260.
- 705 68. Rosenstierne MW, Scholtz-Buchholzer F, Bruzadelli F, Có A, Cardoso P, Jørgensen CS,  
706 Michiels J, Heyndrickx L, Ariën KK, Fischer TK, et al. Zika Virus IgG in Infants with Microcephaly,  
707 Guinea-Bissau, 2016. *Emerg Infect Dis* (2018) **24**:948–950.

708 69. Sheridan MA, Yunusov D, Balaraman V, Alexenko AP, Yabe S, Verjovski-Almeida S,  
709 Schust DJ, Franz AW, Sadovsky Y, Ezashi T, et al. Vulnerability of primitive human placental  
710 trophoblast to Zika virus. *Proc Natl Acad Sci U S A* (2017) **114**:E1587–E1596.

711 70. Dudley DM, Aliota MT, Mohr EL, Newman CM, Golos TG, Friedrich TC, O'Connor DH.  
712 Using Macaques to Address Critical Questions in Zika Virus Research. *Annu Rev Virol* (2019)  
713 **6**:481–500.

714  
715  
716  
717  
718  
719  
720  
721  
722  
723  
724  
725  
726  
727  
728  
729  
730  
731  
732  
733  
734  
735  
736  
737  
738  
739  
740  
741  
742  
743  
744  
745  
746  
747  
748  
749  
750  
751  
752  
753  
754  
755  
756  
757  
758  
759  
760

761  
762

Table 1. Dam information on day 0 of study.

| Dam ID  | Weight (kg) | Age (y) | Gestational Age (days) | Scheduled hysterotomy (days) | Virus    | Dose (PFU)        | Challenge # |
|---------|-------------|---------|------------------------|------------------------------|----------|-------------------|-------------|
| 049-101 | 5.55        | 6.93    | 29                     | 155                          | ZIKV-DAK | 1x10 <sup>7</sup> | 3           |
| 049-102 | 7.40        | 11.83   | 32                     | 155                          | ZIKV-DAK | 1x10 <sup>7</sup> | 3           |
| 049-103 | 8.43        | 12.83   | 31                     | 155                          | ZIKV-DAK | 1x10 <sup>7</sup> | 3           |

763  
764  
765  
766  
767  
768  
769  
770  
771  
772  
773  
774  
775  
776  
777  
778  
779  
780  
781  
782  
783  
784  
785  
786  
787  
788  
789  
790  
791  
792  
793  
794  
795  
796  
797  
798  
799  
800  
801  
802  
803  
804  
805  
806  
807



808  
809

Table 2. Fetal and maternal-fetal interface tissues collected at hysterotomy.

| Dam ID  | Organ System/Tissue            | Tissue samples tested (N) | Tissue samples qRT-PCR positive (N) | Positive tissue vRNA copies/mg |
|---------|--------------------------------|---------------------------|-------------------------------------|--------------------------------|
| 049-101 | integumentary                  | 3                         | 0                                   | 0.0                            |
|         | musculoskeletal                | 2                         | 0                                   | 0.0                            |
|         | nervous                        | 14                        | 0                                   | 0.0                            |
|         | endocrine                      | 7                         | 0                                   | 0.0                            |
|         | lymphatic                      | 8                         | 0                                   | 0.0                            |
|         | cardiovascular                 | 4                         | 0                                   | 0.0                            |
|         | respiratory                    | 10                        | 0                                   | 0.0                            |
|         | digestive                      | 12                        | 0                                   | 0.0                            |
|         | urinary                        | 3                         | 0                                   | 0.0                            |
|         | reproductive                   | 3                         | 0                                   | 0.0                            |
|         | other                          | 8                         | 0                                   | 0.0                            |
|         | primary placental disk         | 3                         | 2                                   | 0.66x10 <sup>2a</sup>          |
|         | primary placental disk         | 3                         | 3                                   | 1.59x10 <sup>3a</sup>          |
|         | placenta with decidua          | 18                        | 3                                   | 8.13x10 <sup>2a</sup>          |
|         | placenta without decidua       | 18                        | 6                                   | 6.45x10 <sup>2a</sup>          |
| decidua | 18                             | 3                         | 0.0                                 |                                |
| 049-102 | nervous (brain)                | 1                         | 1                                   | 2.06x10 <sup>3</sup>           |
|         | digestive (liver)              | 1                         | 1                                   | 1.23x10 <sup>4</sup>           |
|         | umbilical cord                 | 1                         | 1                                   | 8.37x10 <sup>3</sup>           |
|         | fetal membranes                | 1                         | 1                                   | 4.87x10 <sup>3</sup>           |
|         | primary placental disk         | 3                         | 3                                   | 4.96x10 <sup>3a</sup>          |
|         | secondary placental disk       | 3                         | 3                                   | 3.61x10 <sup>3a</sup>          |
|         | decidua                        | 1                         | 0                                   | 0.0                            |
| 049-103 | nervous (brain)                | 1                         | 1                                   | 1.74x10 <sup>5</sup>           |
|         | digestive (liver)              | 1                         | 1                                   | 7.42x10 <sup>4</sup>           |
|         | umbilical cord                 | 1                         | 1                                   | 7.13x10 <sup>4</sup>           |
|         | amnion                         | 1                         | 1                                   | 7.08x10 <sup>2</sup>           |
|         | chorionic jelly                | 1                         | 1                                   | 3.54x10 <sup>3</sup>           |
|         | membranes (amnion and chorion) | 1                         | 1                                   | 4.74x10 <sup>3</sup>           |
|         | primary placental disk         | 3                         | 3                                   | 1.98x10 <sup>3a</sup>          |
|         | secondary placental disk       | 3                         | 3                                   | 3.40x10 <sup>3a</sup>          |
|         | decidua                        | 1                         | 0                                   | 0.0                            |

<sup>a</sup>mean vRNA load of multiple positive tissue samples

810  
811

812 Table 3. 049-101 fetal and placental measurements (~155 days gestation, 122 days post challenge).  
 813 Measurements were considered to be within normal limits by ultrasound and gross assessment (40). R =  
 814 right, L = left.  
 815

| Tissue                      | Measure (mm) | Weight (g) |
|-----------------------------|--------------|------------|
| whole body                  | 180.0        | 405.75     |
| biparietal diameter         | 52.3         | -          |
| head circumference          | 186.0        | -          |
| brain                       | -            | 54.42      |
| cerebrum                    | -            | 50.2       |
| cerebellum with midbrain    | -            | 3.31       |
| cerebellum without midbrain | -            | 2.47       |
| r./l. eye                   | 13.6/13.8    | 1.34/1.35  |
| r./l. thyroid               | -            | 0.07/0.07  |
| thymus                      | -            | 1.42       |
| spleen                      | -            | 0.58       |
| liver                       | -            | 12.08      |
| r./l. adrenal               | -            | 0.12/0.17  |
| r./l. kidney                | -            | 1.00/0.99  |
| lung lobes                  | -            | 8.76       |
| r./l. testis                | -            | 0.06/0.06  |
| placenta                    | 145.0 x 85.0 | 159.19     |
| r./l. femur                 | 52.8/53.0    | -          |

816  
 817  
 818  
 819  
 820  
 821  
 822  
 823  
 824  
 825  
 826  
 827  
 828  
 829  
 830  
 831  
 832

833  
834  
835

Table 4. Histopathological assessment of placental tissues from all animals and fetal tissues from 049-101.

| Dam ID  | Tissue                   | Findings                                                                                                                                            |
|---------|--------------------------|-----------------------------------------------------------------------------------------------------------------------------------------------------|
| 049-101 | primary placental disk   | focally extensive hemorrhage within the basal plate; mild multifocal villous mineralization                                                         |
|         | decidua                  | mild multifocal persistent muscularization of decidual arteries                                                                                     |
|         | fetal brain              | no pathological changes                                                                                                                             |
|         | fetal eye                | no pathological changes                                                                                                                             |
|         | fetal lung               | mild bilateral diffuse intra-alveolar squamous cells, similar to control                                                                            |
| 049-102 | primary placental disk   | moderate to marked intervillous hemorrhage and parenchymal ischemia with acute intervillous inflammation; minimal multifocal villous mineralization |
|         | secondary placental disk | significant necrosis for gestational age, nonviable embryo; not associated with specific pathologic process                                         |
|         | decidua                  | early decidual vasculitis                                                                                                                           |
| 049-103 | primary placental disk   | mild focal ischemia with coagulative necrosis and acute neutrophilic intervillitis; mild multifocal villous mineralization                          |
|         | secondary placental disk | changes in placental disks are mild and non-specific                                                                                                |
|         | decidua                  | minimal multifocal decidual necrosis with acute inflammation and two non-occlusive thrombi                                                          |

836  
837  
838  
839  
840  
841  
842  
843  
844  
845  
846  
847  
848  
849

850

851 Figure legends

852

853 **Figure 1.** Study design. Three female rhesus macaques were time-mated, confirmed pregnant by  
854 ultrasound, and challenged intravaginally at ~30 days gestational age with  $1 \times 10^7$  PFU ZIKV-DAK three  
855 times at two-hour intervals. Blood collection\* denotes plasma and PBMC isolation at every sampling time  
856 point while serum collection was planned only on days 0, 14, 27, and 122 post-ZIKV challenge. Ultrasound#  
857 denotes ultrasound imaging was performed every 3-4 days during early gestation, then weekly thereafter.  
858 Hysterotomies were originally planned for each animal at approximately 122 days post-ZIKV challenge.

859

860 **Figure 2.** Intravaginal ZIKV challenge resulted in detection of vRNA in plasma for all three dams. The x-  
861 axis shows days post-ZIKV challenge. The y-axis starts at the estimated limit of quantification of the qRT-  
862 PCR assay ( $1 \times 10^2$  copies/ml) and is shown as copies/ml plasma on the log scale. Plasma vRNA loads are  
863 displayed for dam 049-101 as orange triangles, for dam 049-102 as blue circles, and for dam 049-103 as  
864 magenta squares. For comparison, ZIKV plasma vRNA loads are also shown for three pregnant macaques  
865 subcutaneously (SC) inoculated with  $1 \times 10^4$  PFU ZIKV-DAK and are displayed as gray dashed lines and  
866 noted as  $10^4$  PFU SC in the legend (49).

867

868 **Figure 3.** Pregnancy outcomes and maternal-fetal interface (MFI) and fetal tissue vRNA loads. **(A)**  
869 Pregnancy outcomes for three dams intravaginally inoculated 3x with ZIKV at approximately 30 days  
870 gestation. Two dams (049-102 and 049-103) were determined by ultrasound to have non-viable embryos  
871 at approximately 17-18 days post-ZIKV challenge. Hysterotomies and embryo and MFI tissue collections  
872 were performed 3 days after detection. Dam 049-101's pregnancy continued until scheduled hysterotomy  
873 and extensive tissue collection at approximately 155 days gestational age. **(B)** Average ZIKV vRNA loads  
874 for positive embryo and MFI tissues collected at hysterotomy from dams 049-102 (blue) and 049-103  
875 (magenta) following embryonic death at approximately 17-18 days post-ZIKV challenge. The dashed line  
876 represents the average of the estimated limit of detection (50-100 copies/mg, average: 75 copies/mg  
877 tissue) for the qRT-PCR assay. **(C)** Average ZIKV vRNA loads for positive MFI tissues collected at  
878 hysterotomy from dam 049-101 (orange) at approximately 122 days post-ZIKV infection. Fetal tissues were  
879 negative for ZIKV RNA by qRT-PCR. The dashed line represents the average of the estimated limit of  
880 detection (50-100 copies/mg, average: 75 copies/mg tissue) for the qRT-PCR assay.

881

882 **Figure 4.** ZIKV genomic RNA was detected by *in situ* hybridization (ISH) in placental tissues collected from  
883 dams 049-102 and 049-103, but not from dam 049-101. For all images, red coloration is indicative of  
884 positive staining for ZIKV genomic RNA. Overall, positive staining is focal but visible in multiple areas.  
885 Insets show close-ups of the areas denoted by the black arrows in each larger panel. Representative  
886 images are shown of **(A)** primary placental disk from 049-103, **(B)** secondary placental disk from 049-103,  
887 **(C)** primary placental disk from 049-102, and **(D)** secondary placental disk from 049-102.

888

889 **Figure 5.** All three dams developed neutralizing antibodies (nAbs) against ZIKV as detected by PRNT<sub>90</sub>  
890 following intravaginal ZIKV infection. The x-axis is the log<sub>10</sub> reciprocal serum dilution and the y-axis is the  
891 percent plaque reduction for ZIKV-DAK. Day 0 for all animals is shown as symbols with 049-101  
892 represented by orange triangles, 049-102 represented by blue circles, and 049-103 represented by  
893 magenta squares. Dashed gray horizontal lines indicate the PRNT<sub>90</sub> and PRNT<sub>50</sub> cut-offs respectively.  
894 Neutralization curves were generated using non-linear regression to estimate the dilution of serum required  
895 to inhibit 90% of Vero cell culture infection. Neutralization curves are shown for days 14 (dashed lines) and  
896 24 (dotted lines) for dams 049-102 (blue) and 049-103 (magenta), and for days 14, 27, and 122 (dashed  
897 and dotted line) for dam 049-101 (orange).

898



Figure 2.

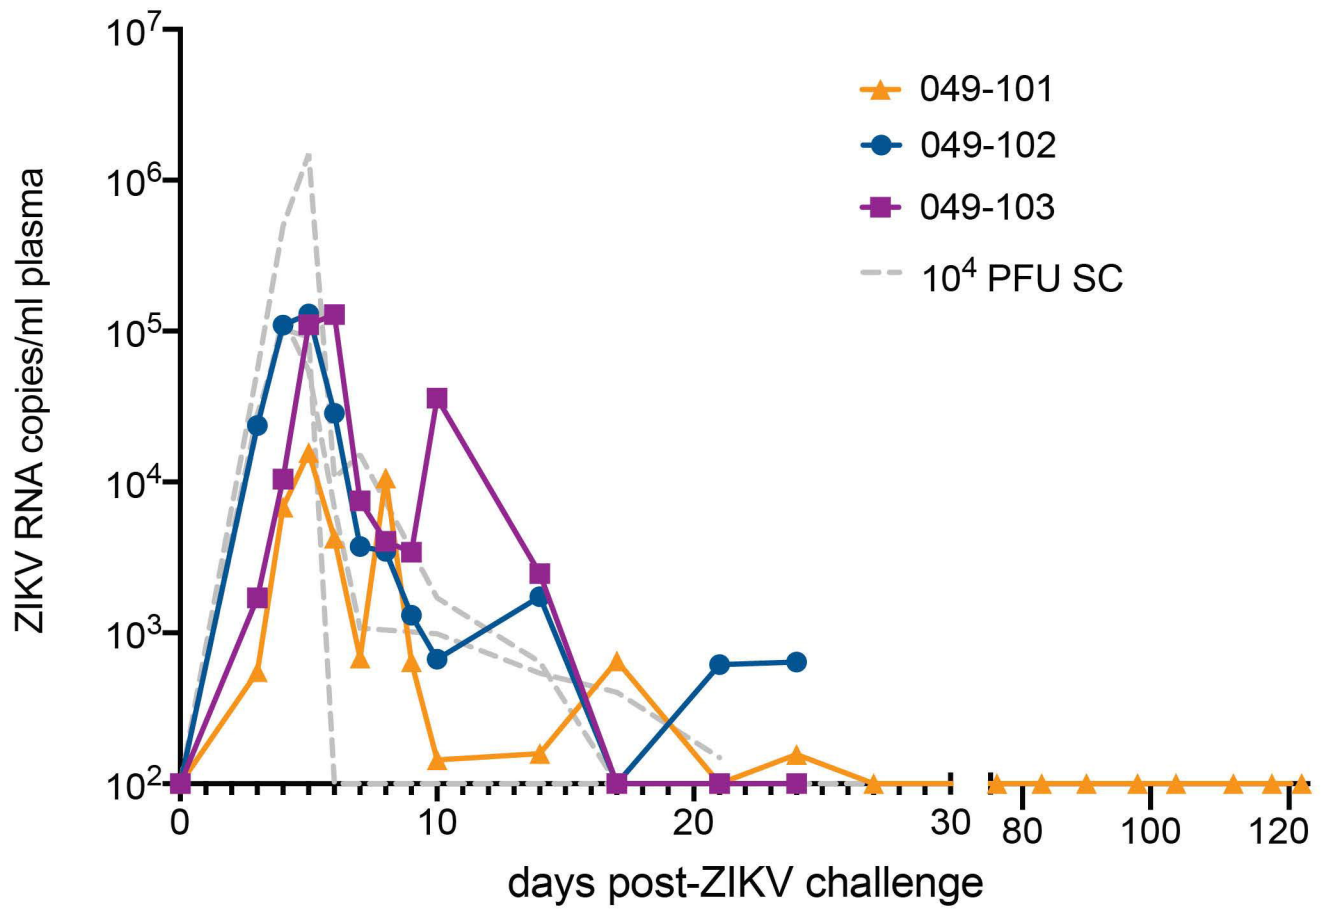

Figure 3.

(A)

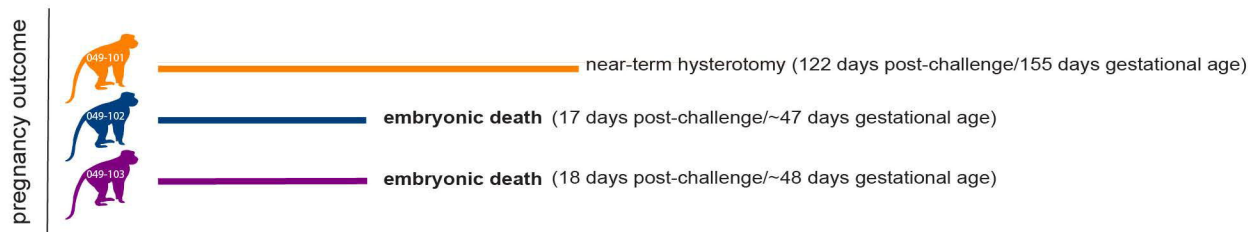

(B)

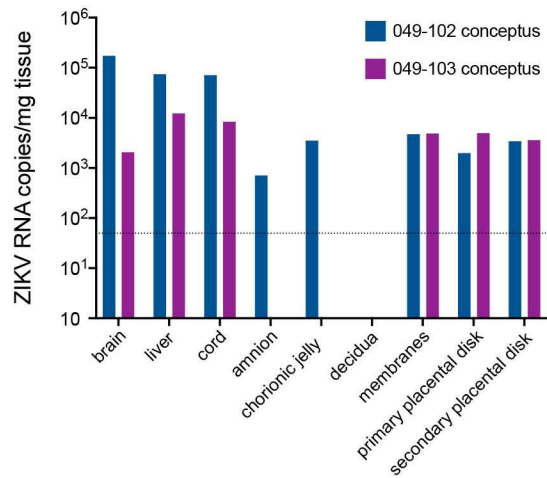

(C)

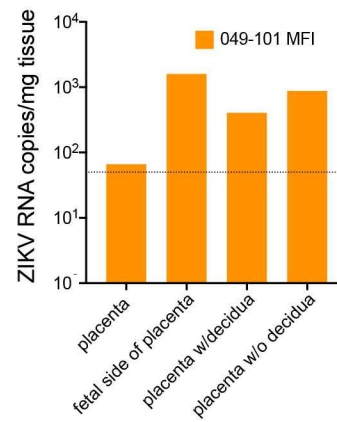

Figure 4.

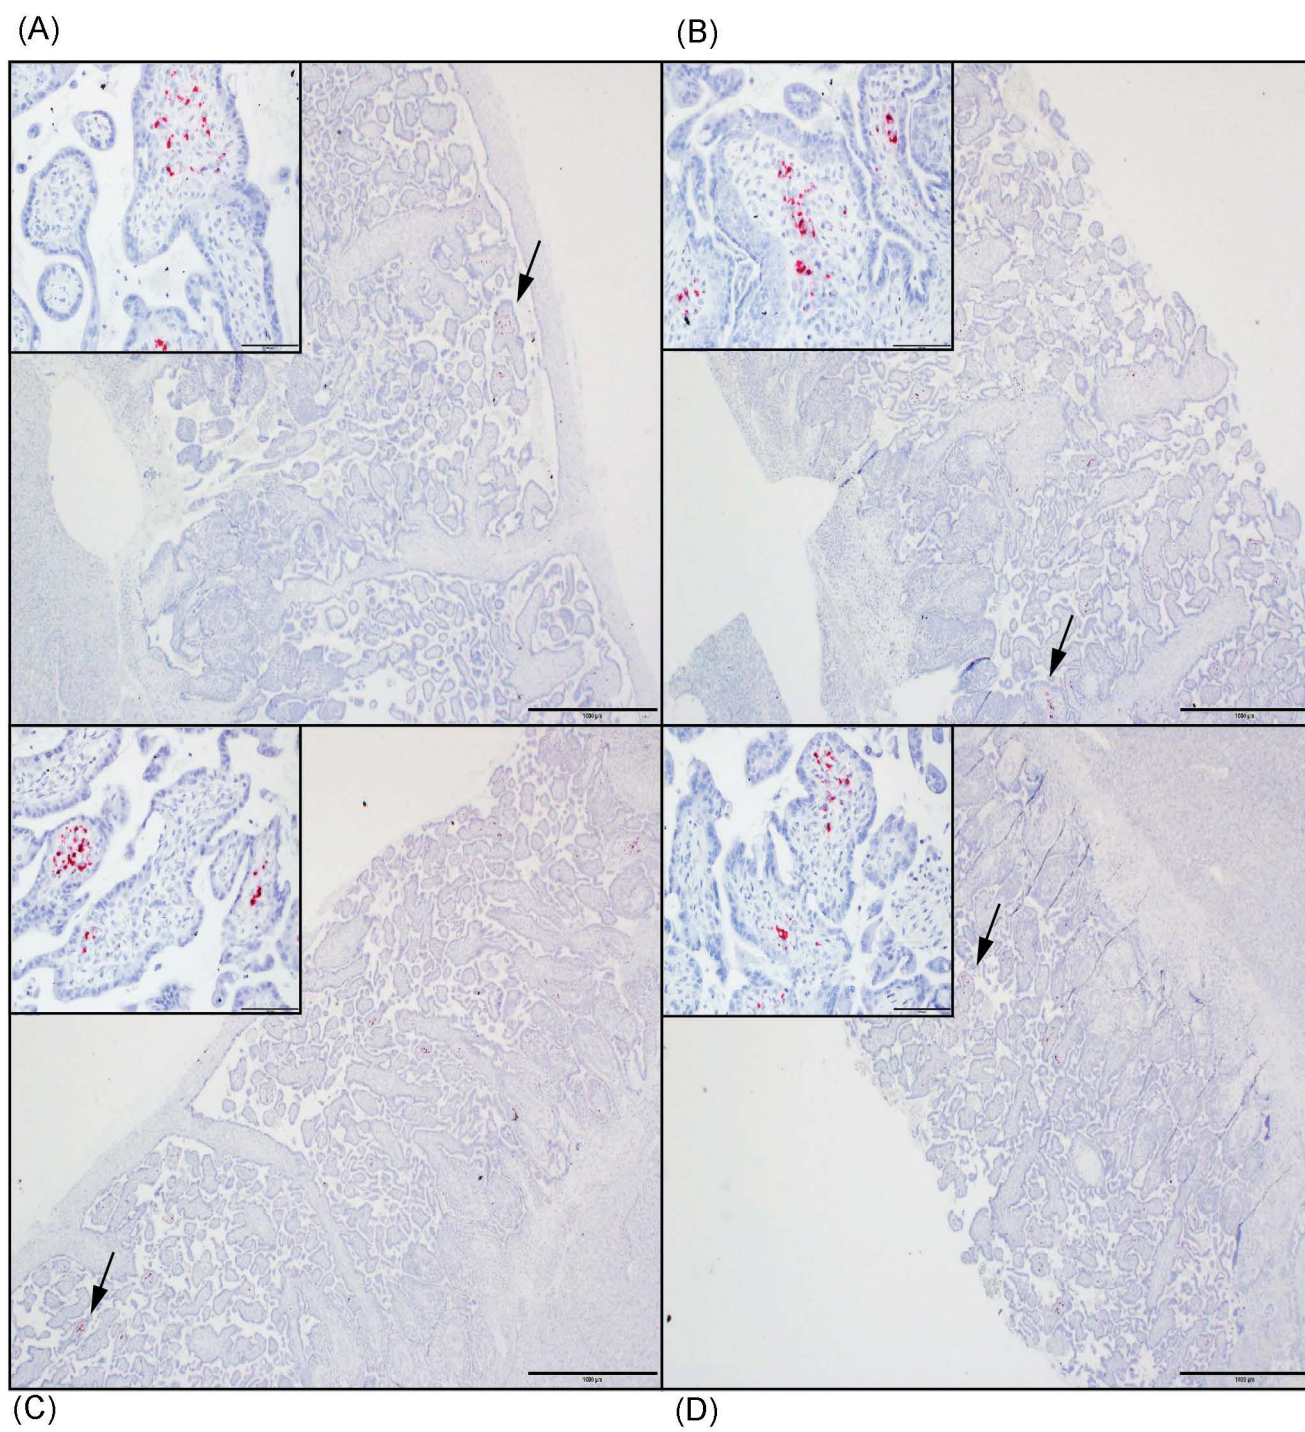



Figure 5.

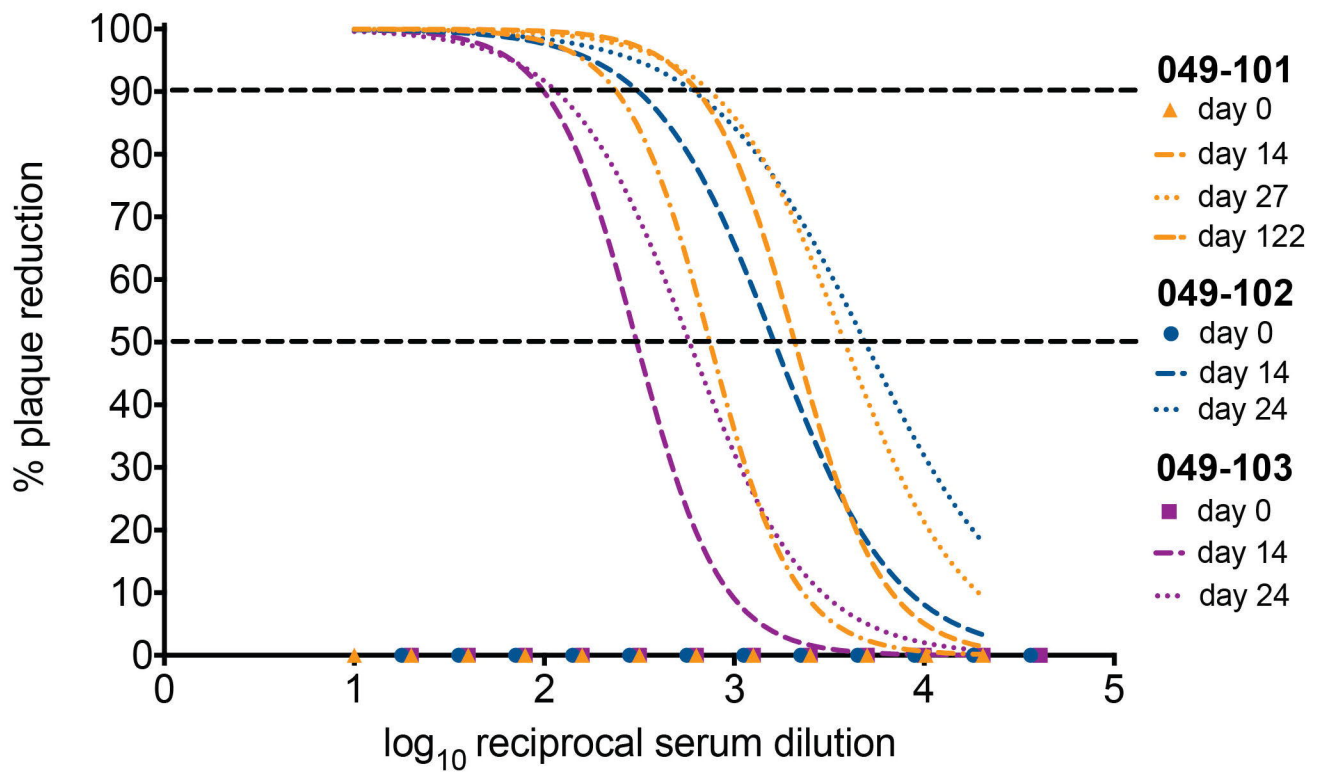

Source: https://biorxiv.org/content/10.1101/2021.04.03.437254v1.full.pdf
